# Supplementary material
Source: publisher site journal article supplement (https://www.dovepress.com/article/354224)
Supplement: Supplementary file 1 [file get_supplementary_file.php]

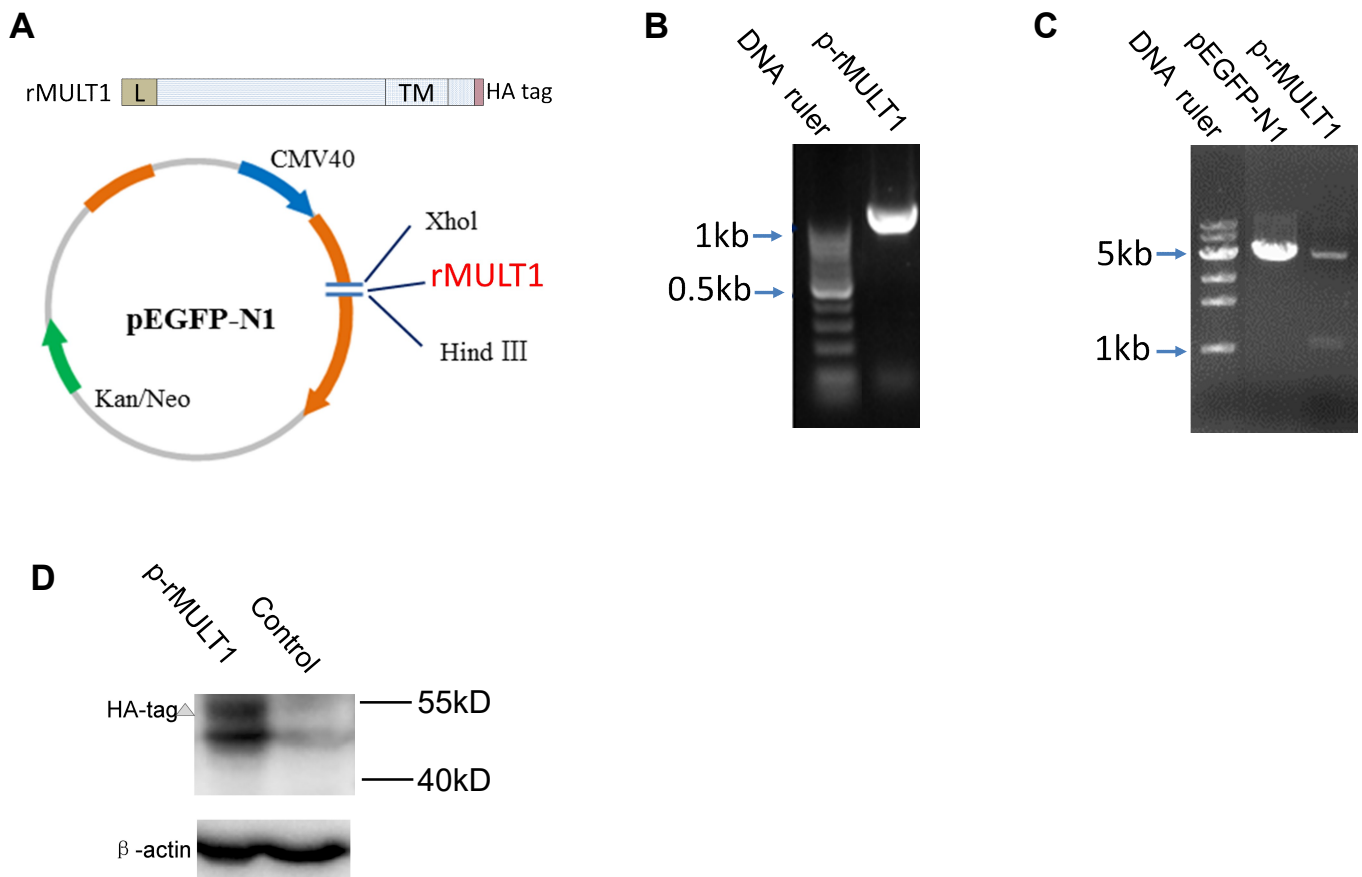

**Figure S1.** Construction of eukaryotic plasmid encoding rMULT1 with pEGFP-N1 used as the backbone. (A) Construction design. (B) PCR analysis and (C) restriction enzyme digestion analysis of a selected clone of constructs. (D) Western blot assay of rMULT1 protein expressed by 293T cells using HA-tag specific antibody. 293T cells were transiently transfected with p-rMULT1 or control plasmid. Western blot analysis was performed for cellular protein extract, without deglycosylation 48 h post-transfection. The band beside the filled triangle indicates rMULT1 without deglycosylation, with an approximate molecular weight of 50 kDa. MULT1, murine UL16-binding protein-like transcript 1; p-rMULT1, plasmid encoding recombinant MULT1; Control, control plasmid, another pEGFP-N1 based construct encoding a truncated form of MULT1, whose product will lack the 50 kDa band on the membrane of western blot assay, was used as a control plasmid.; HA, hemagglutinin.

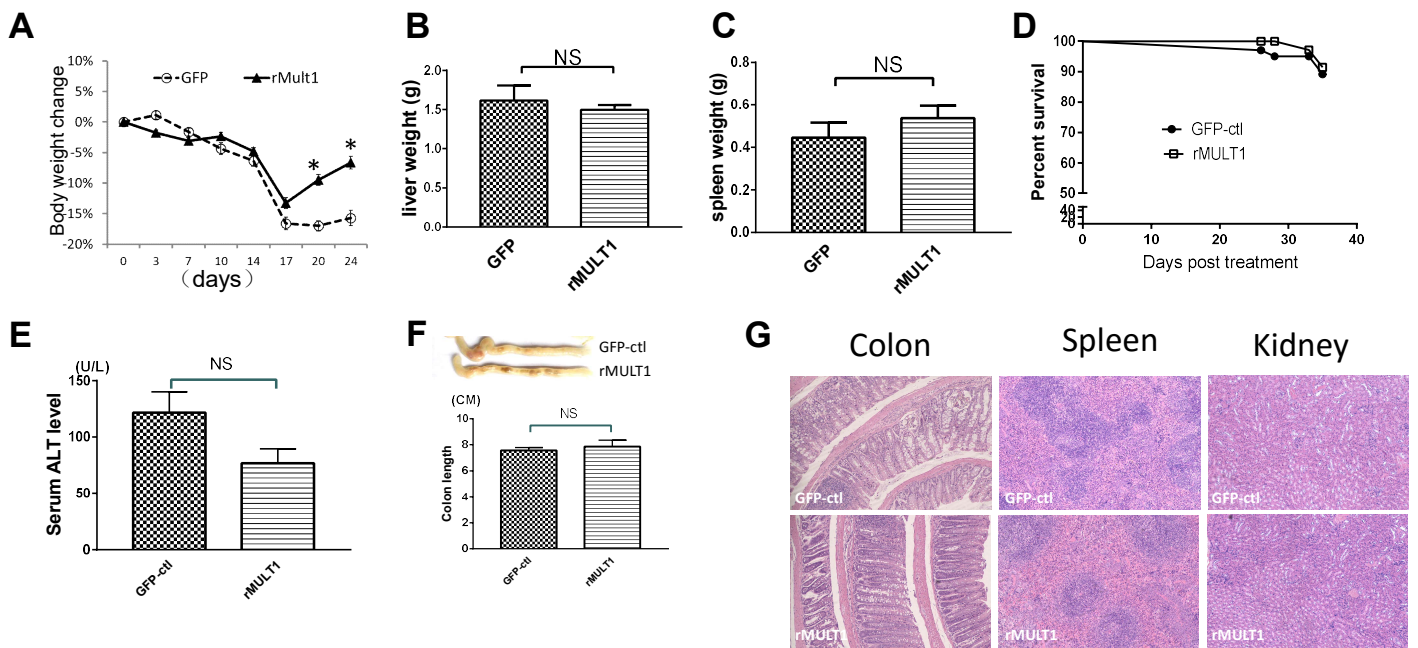

**Figure S2.** (A) Treatment with p-rMULT1 improved body weight loss due to *S. japonicum* infection and did not change (B) liver weight or (C) splenic weight. (D) Pooled data (n=18) showing no survival difference between the two groups. Similar (E) serum ALT level, (F) length of colon as well as (G) morphology of colon, spleen and kidney (magnification X100) were observed in both groups. Data are representative of 4-6 animals per subgroup and 3 independent experiments except otherwise clarified. \*P<0.05. MULT1, murine UL16-binding protein-like transcript 1; rMULT1, recombinant MULT1.
